# Supplementary material for: Synthesis and Characterization of Schiff Base Polymers via Metal Coordination and Its Application in Infrared Stealth Coating
Source: MDPI journal article supplement (doi:10.3390/polym14214563), 2022-10-27
Supplement: s1 [file s1]

## Supplementary Materials

# Synthesis and Characterization of Schiff Base Polymers via Metal Coordination and Its Application in Infrared Stealth Coating

Xiangyu Li, Lishuai Zong, Weijie Li, Yibo Wang, Jinyan Wang \* and Xigao Jian

State Key Laboratory of Fine Chemicals, Liaoning High Performance Resin Engineering Research Center, Department of Polymer Science & Engineering, Dalian University of Technology, Dalian 116024, China  
\* Correspondence: wangjinyan@dlut.edu.cn

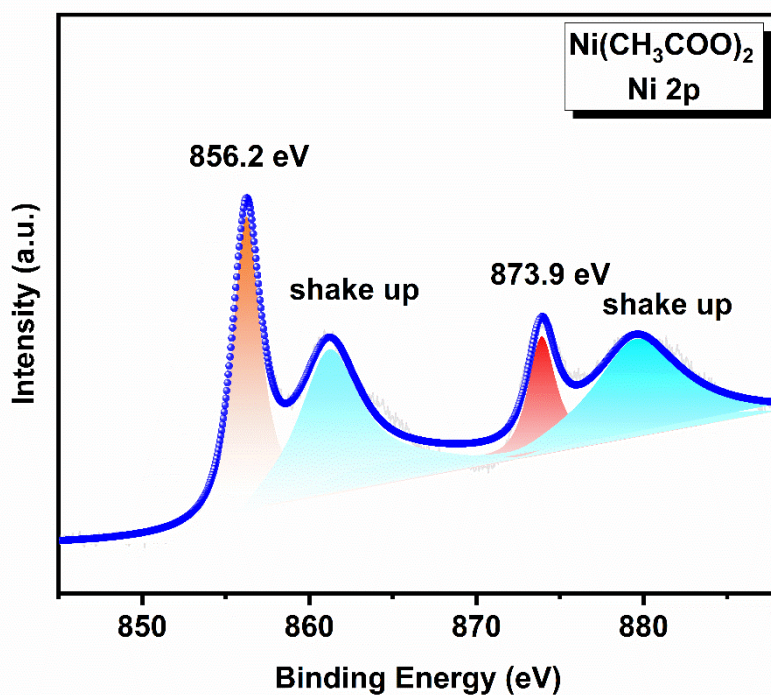

Figure S1. XPS spectrum of Nickel(II) acetate tetrahydrate.

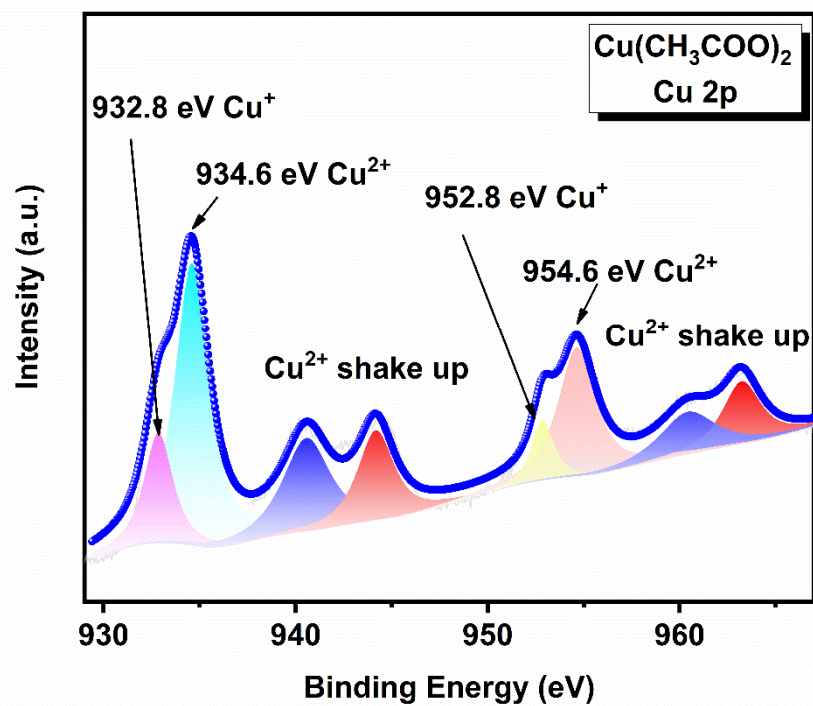

Figure S2. XPS spectrum of Copper(II) acetate.

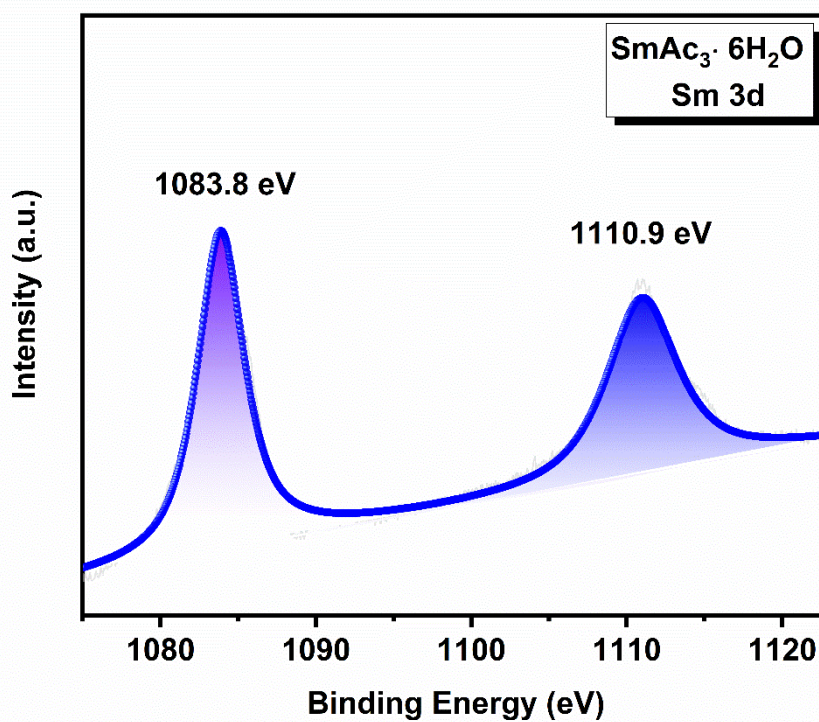

Figure S3. XPS spectrum of Samarium(III) acetate hydrate.
